# Supplementary material for: Complex patterns of gene expression in human T cells during in vivo aging
Source: Royal Society of Chemistry journal article supplement (doi:10.1039/c004635c), 2010-08-05
Supplement: c004635c.pdf [file c004635c.pdf]

## SUPPLEMENTARY TABLE AND FIGURE LEGENDS

**Table 1 Supplementary:** list of the significant probes after Benjamini-Hochberg post-hoc correction ( $P < 0.05$ ). GenBank, GenBank accession number (and probe ID in the array); Symbol, UniGene, Description for known genes. Pval AdjustedBH, Pvalue associated to each probe after Benjamini-Hochberg correction

**Table 2 supplementary:** list of genes validated by RT-PCR. The P value ( $P_{BH}$ ) and the cluster to which each gene belongs to in the expression array are shown.

**Table 3 supplementary:** list of genes that constitute a signature of T cells (as in<sup>17</sup>) also found in our dataset. The last column shows the cluster they belong to.

**Table 4 supplementary:** list of genes that constitute a signature of aging (as in<sup>18</sup>) also found in our dataset. The P values obtained from our statistical analysis, as well as the ratio of the average expression for our samples in the same age groups as in<sup>18</sup>, are shown.

**Table 5 supplementary:** Kegg pathways sorted by node Betweenness Centrality in the network of Figure 3. Fullcode: Kegg pathway code; Name: Kegg pathway name; K node connectivity; BC node betweenness centrality; Cluster: gene cluster in which such pathway is significant (clusters 1, 2, 3, as in Table 1; 0 = not significant pathway).

**Figure 1 supplementary: gene expression correlation for each cluster.** From left to right: correlation coefficients histogram for the expression profiles of the genes belonging to cluster 1 to 3 respectively.

**Figure 2 supplementary: mean trend of TF related to significant TFBS found in array.** From left to right: average expression for the TF found in our dataset whose TFBSs are overrepresented in cluster 1 to 3 respectively. X axis: average age inside each age group.
